# Supplementary material for: Microfluidic transfer of liquid interface for parallel stretching and stamping of terminal-unmodified single DNA molecules in zigzag-shaped microgrooves
Source: Royal Society of Chemistry journal article supplement (doi:10.1039/c4lc00990h), 2014-09-26
Supplement: c4lc00990h2.pdf [file c4lc00990h2.pdf]

## Supplementary Information for

Microfluidic transfer of liquid interface for parallel stretching and stamping of  
terminal-unmodified single DNA molecules in zigzag-shaped microgrooves

Hirotoishi Yasaki\*, Daisuke Onoshima\*, Takao Yasui, Hiroshi Yukawa, Noritada Kaji, and  
Yoshinobu Baba

\*correspondence to:

onoshima-d@nanobio.nagoya-u.ac.jp

yasaki.hirotoishi@e.mbox.nagoya-u.ac.jp

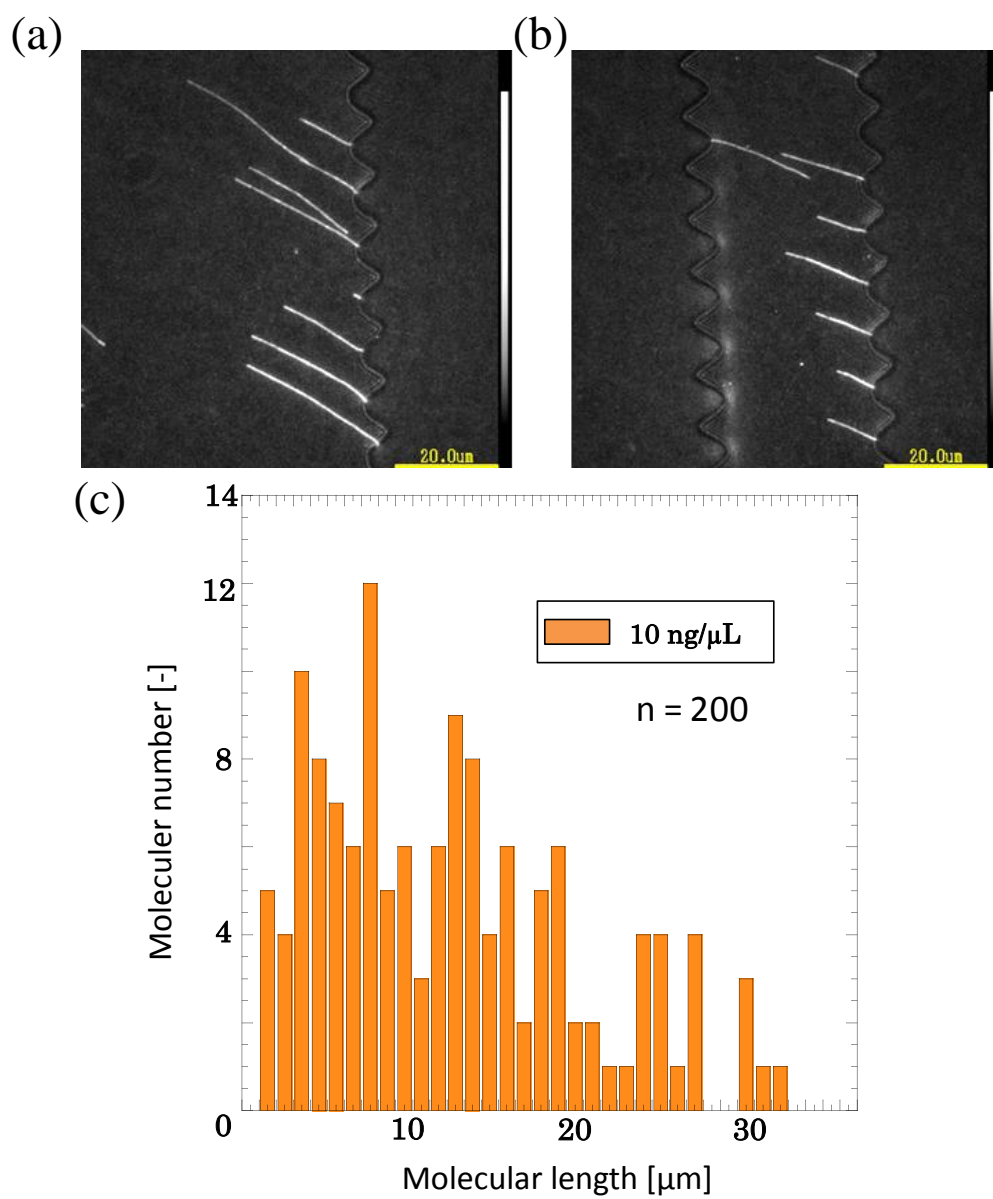

**Supplementary Figure 1.** Blowing method for simple DNA stretching. (a) and (b) are images of aligned  $\lambda$ DNA molecules by air blowing. (c) Histogram of molecular lengths obtained from aligned  $\lambda$ DNA molecules.

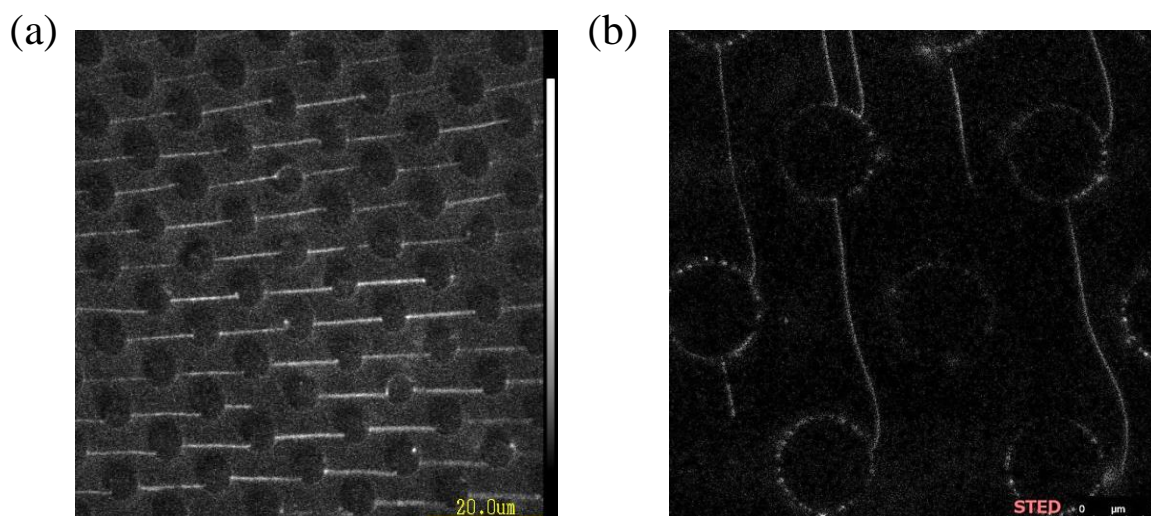

**Supplementary Figure 2.** Aligned  $\lambda$ DNA molecules on a hole structure. (a) TIRFM image. (b) STED image.

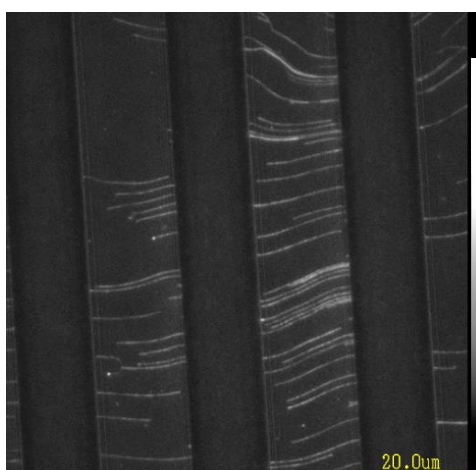

**Supplementary Figure 3.** Aligned  $\lambda$ DNA molecules on a line and space structure.

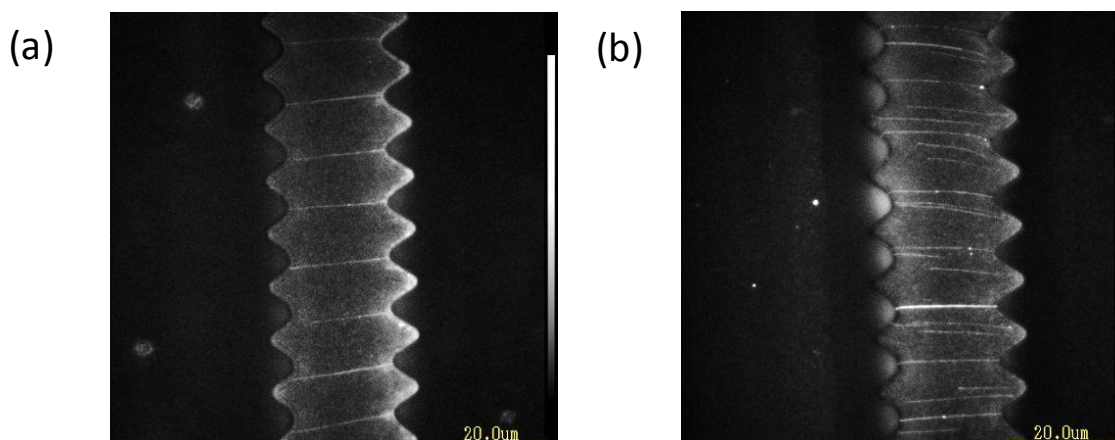

**Supplementary Figure 4.** Effect of DNA concentration on stretching form. (a) 10 ng/μL, (b) 20 ng/μL.

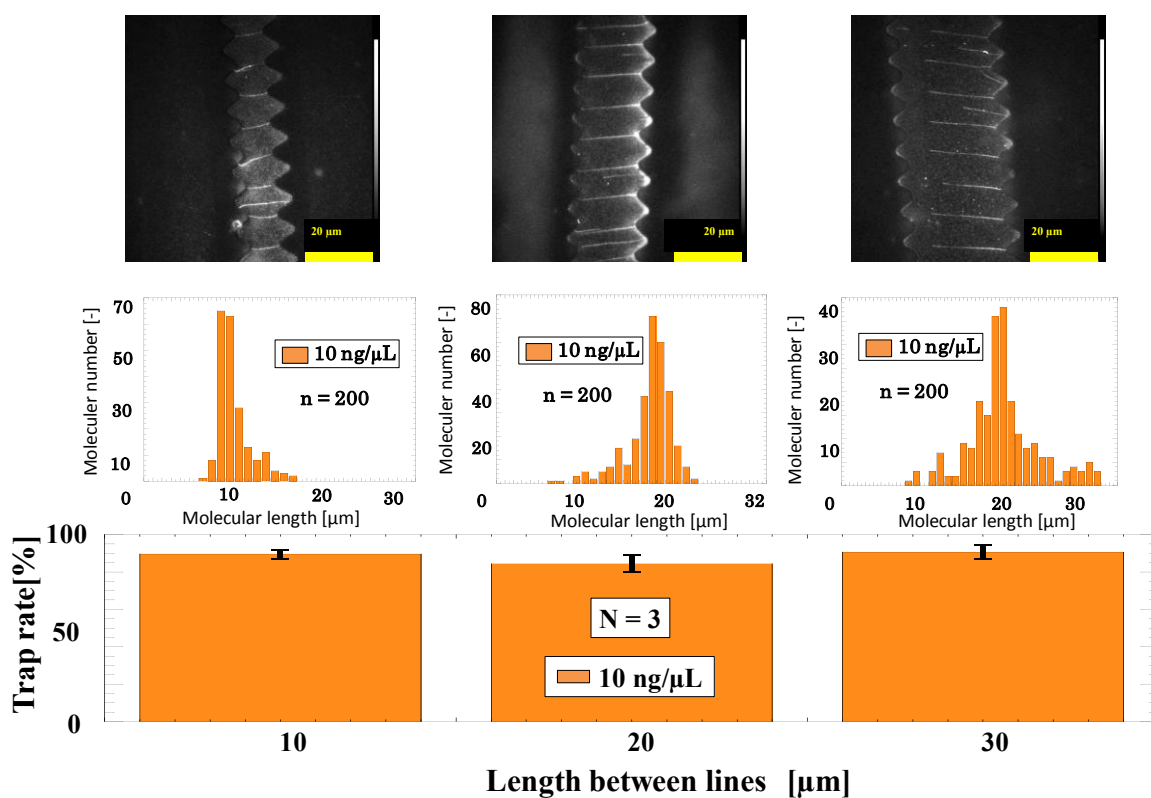

**Supplementary Figure 5.** Rate of DNA trapping for different lengths between cavities in zigzag structures.

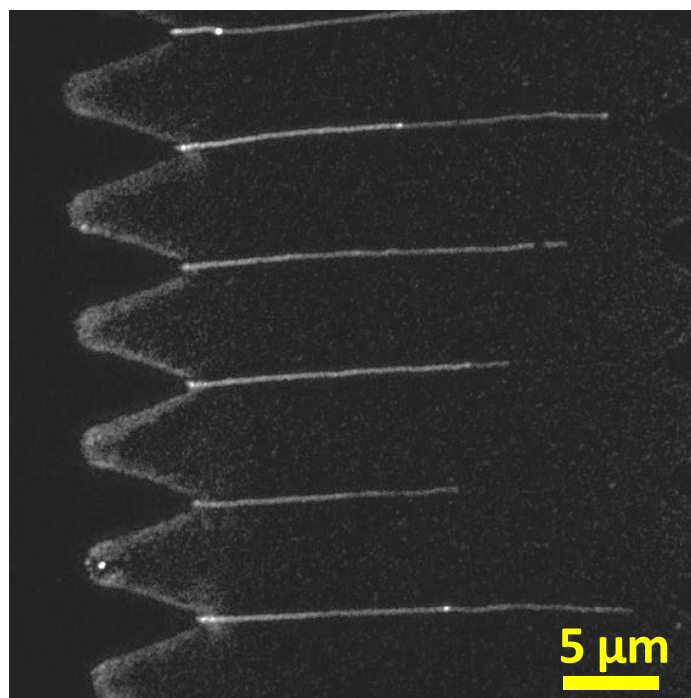

**Supplementary Figure 6.** An STED image of aligned  $\lambda$ DNA molecules on a zigzag structure.

### **Supplementary Video**

This movie shows a real-time observation of molecular stretching at the liquid interface on a zigzag structure. The time lapse covers a period of about 17 s. (WMV; 3.4 MB)
